# Supplementary material for: Biocatalytic Amplification of UV Signal in Capillary Electrophoresis of MicroRNA
Source: MDPI journal article supplement (doi:10.3390/ijms21010051), 2019-12-19
Supplement: s1 [file s1]

## Supplementary materials:

# Biocatalytic Amplification of UV Signal in Capillary Electrophoresis of MicroRNA

Ruibin Hu <sup>1,2</sup> and Yi Chen <sup>1,2,3,\*</sup>

<sup>1</sup> Key Laboratory of Analytical Chemistry for Living Biosystems, Institute of Chemistry, Chinese Academy of Sciences, Beijing 100190, China; huruibin66@iccas.ac.cn

<sup>2</sup> University of Chinese Academy of Sciences, Beijing 100049, China

<sup>3</sup> Beijing National Laboratory for Molecular Science, Beijing 100190, China

\* Correspondence: chenyi@iccas.ac.cn

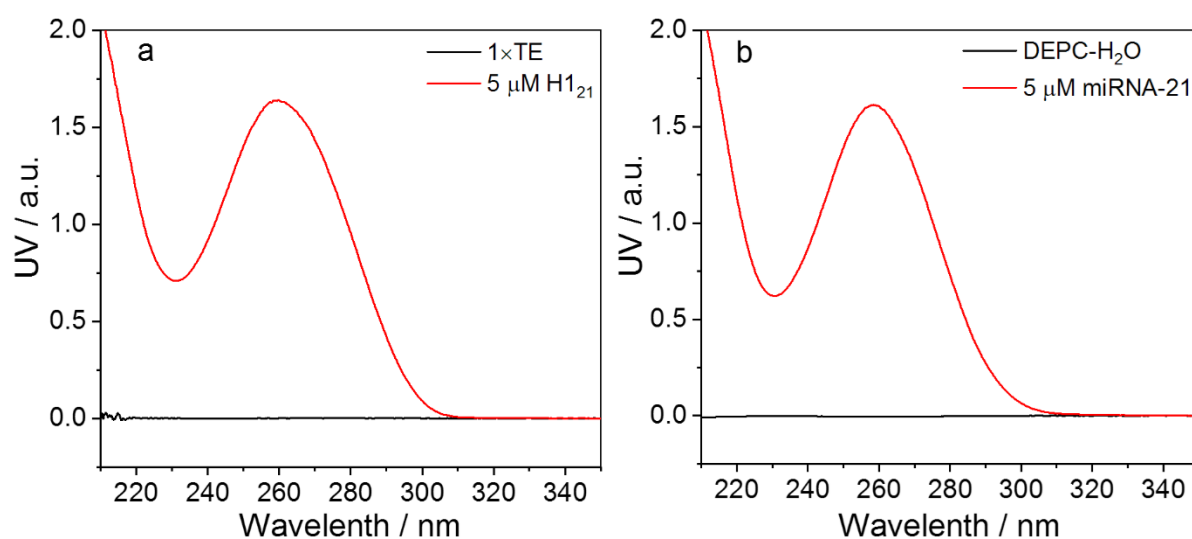

**Figure S1.** DNA ultraviolet absorption spectrum. (a) H1<sub>21</sub> were dissolved in 1×TE buffer (10 mM Tris and 1 mM EDTA, pH 8.0) solution. (b) miRNA-21 were dissolved in diethyl pyrocarbonate (DEPC) treated water.

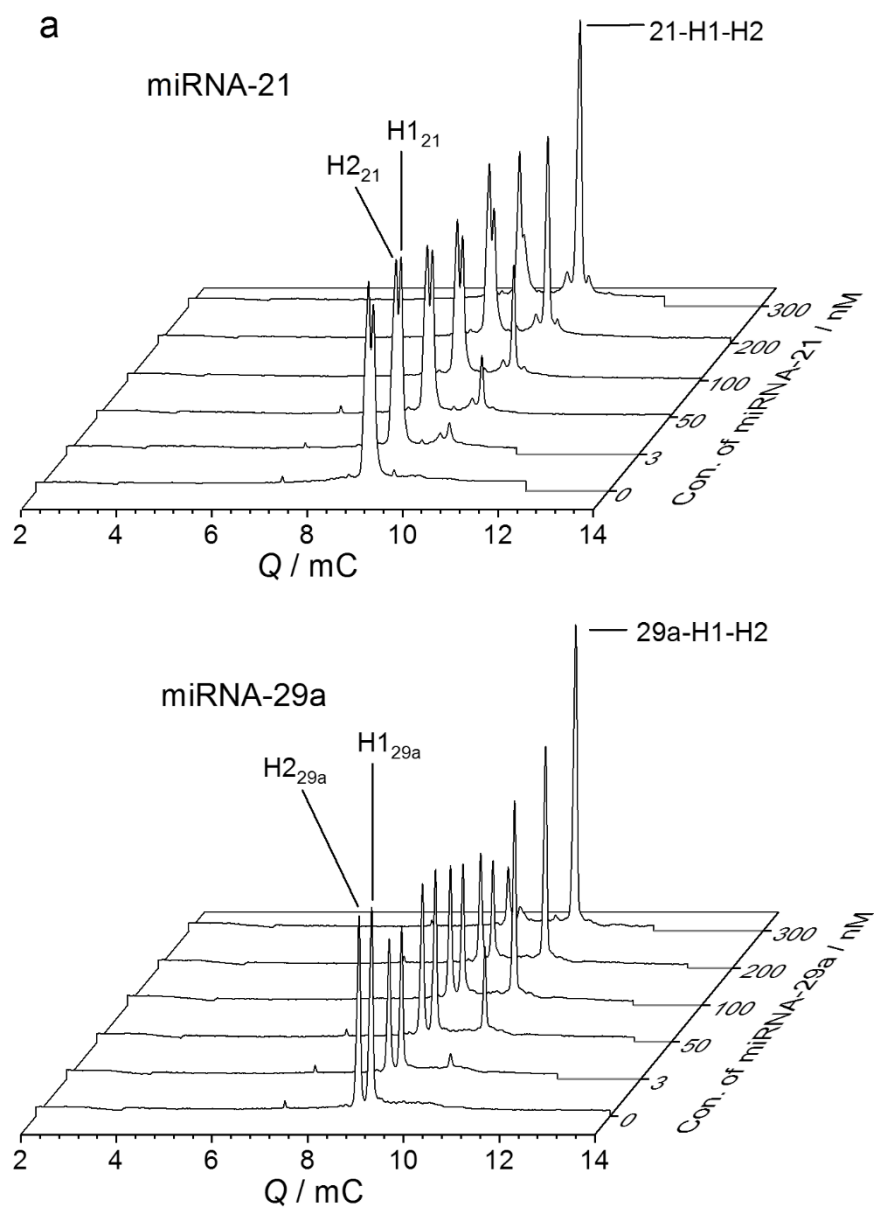

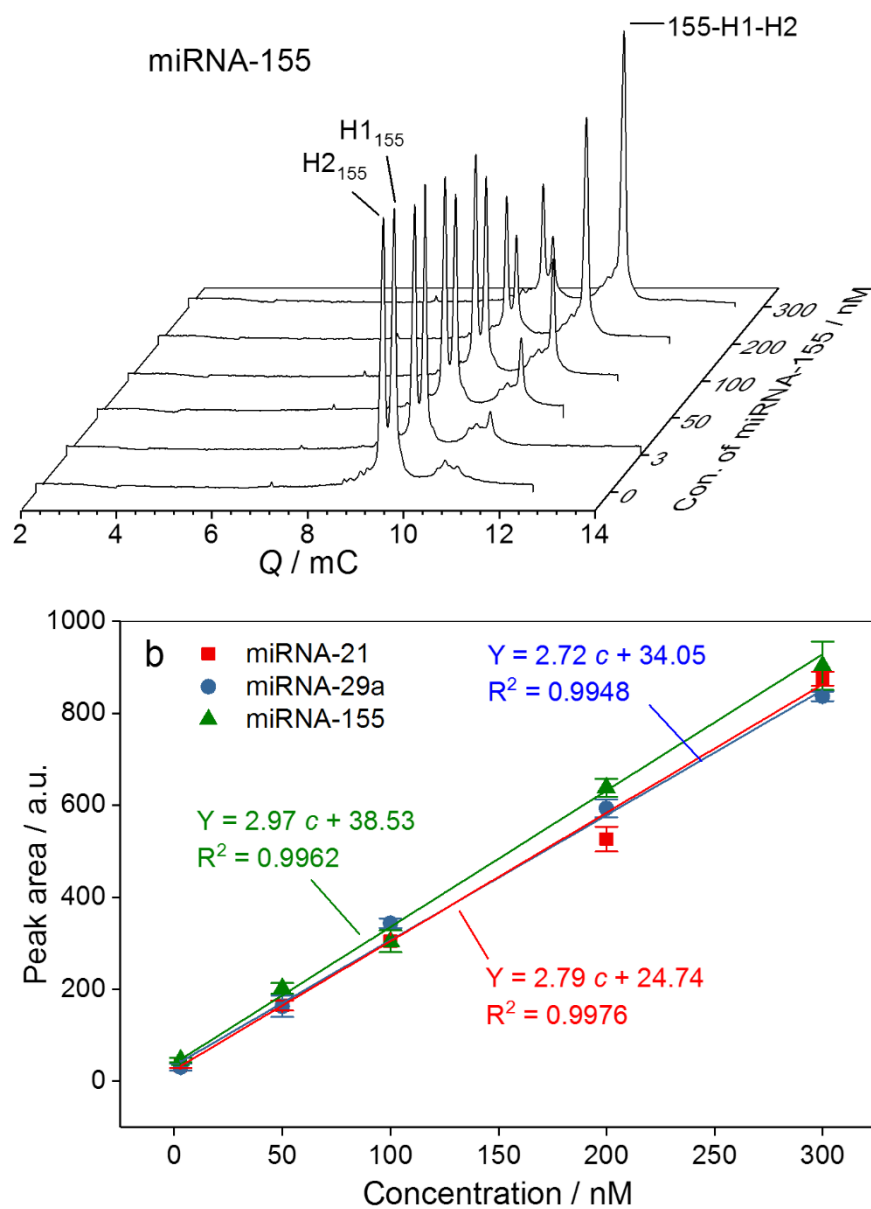

**Figure S2** (a) Q-electropherogram of dsDNA produced by miRNA at the different concentrations; (b) The linear relationship of dsDNA product versus the concentration of miRNA. Other conditions as in Figure 2

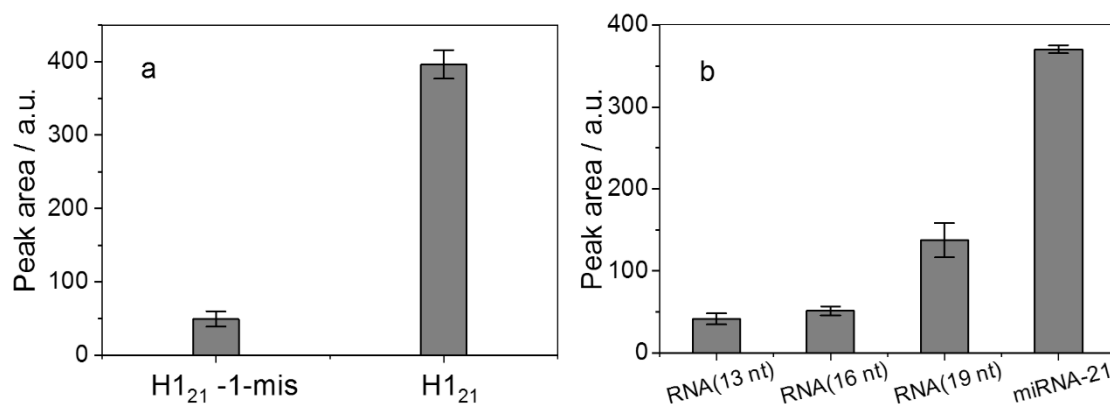

**Figure S3** The impact of H1<sub>21</sub> single base mismatch and various fragments of RNA for the method. (a) miRNA-21(100 nM) mixed with their corresponding pairs of H1<sub>21</sub>-1-mis (4  $\mu$ M) and H2<sub>21</sub> (6  $\mu$ M), (b) miRNA-21, RNA(13 nt), RNA(16 nt), RNA(19 nt) (100 nM each) mixed with H1<sub>21</sub> (4  $\mu$ M) and H2<sub>21</sub> (6  $\mu$ M), respectively. And they were incubated at 37  $^{\circ}$ C for 2.5 h. Other conditions as in Figure 2

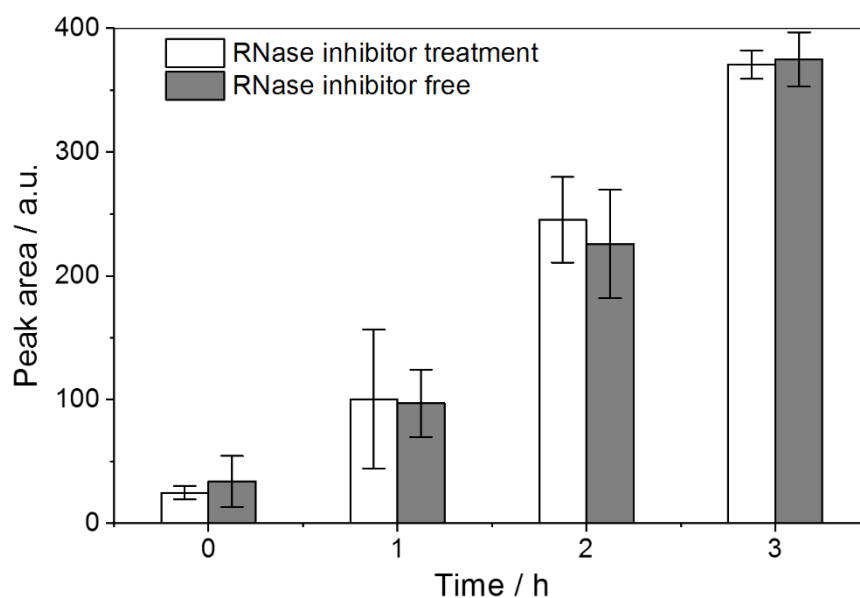

**Figure S4** Dynamic monitoring of miRNA stability within effective time by adding RNase inhibitor. Mixture: miRNA-21 (100 nM) added with their corresponding pairs of H1<sub>21</sub> (4  $\mu$ M) and H2<sub>21</sub> (6  $\mu$ M), RNase inhibitor (20 U), and incubated at 37  $^{\circ}$ C. Other conditions as in Figure 2

**Table S1.** Sequences of the oligonucleotides used in the experiments.

| Name                    | Sequences (5'–3')                                                         |
|-------------------------|---------------------------------------------------------------------------|
| miRNA-21                | UAG CUU AUC AGA CUG AUG UUG A                                             |
| miRNA-29a               | ACU GAU UUC UUU UGG UGU UCA G                                             |
| miRNA-155               | UUA AUG CUA AUC GUG AUA GGG GU                                            |
| miRNA-205               | UCC UUC AUU CCA CCG GAG UCU G                                             |
| miRNA-141               | UAA CAC UGU CUG GUA AAG AUG G                                             |
| RNA (19 nt)             | UAG CUU AUC AGA CUG AUG A                                                 |
| RNA (16 nt)             | UAG CUU AUC AGA CUG A                                                     |
| RNA (13 nt)             | UAG CUU AUC AGA C                                                         |
| H1 <sub>21</sub>        | TCA ACA TCA GTC TGA TAA GCT ACC TAT GTG GAT AGC TTA TCA GAC T             |
| H2 <sub>21</sub>        | TAA GCT ATC CAC ATA GGT AGC TTA TCA GAC TCC TAT GTG GA                    |
| H1 <sub>29a</sub>       | CTG AAC ACC AAA AGA AAT CAG TCG TCT GTA CTG ATT TCT                       |
| H2 <sub>29a</sub>       | ATC AGT ACA GAC GAC TGA TTT CTC GTC TGT                                   |
| H1 <sub>155</sub>       | ACC CCT ATC ACG ATT AGC ATT AAA ACA CGT TAT GGT ACT TTT AAT GCT AAT CGT G |
| H2 <sub>155</sub>       | AGC ATT AAA AGT ACC ATA ACG TGT TTT AAT GCT AAT CGT GCA CGT TAT GGT AC    |
| H1 <sub>21</sub> -1-mis | TCA AGA TCA GTC TGA TAA GCT ACC TAT GTG GAT AGC TTA TCA GAC T             |
